# Supplementary material for: Biodiversity of carapace epibiont diatoms in loggerhead sea turtles (Caretta caretta Linnaeus 1758) in the Aegean Sea Turkish coast
Source: PeerJ. 2020 Jul 17;8:e9406. doi: 10.7717/peerj.9406 (PMC7370927; doi:10.7717/peerj.9406)
Supplement: Supplemental Information 2 — A list of the observed species, SIMPER analysis of diatom contribution and dominant taxa habitat preferences. [file peerj-08-9406-s002.xlsx]

## Sheet: Diversity
codes	18866 TRYB-404		codes	18867 TRY-0074		codes	18868 TRY-0075		codes	19772		codes	19776		codes	19780		codes	19781		codes	19782		codes	20679 TRY-0200		codes	20690 TRY-0008		codes	20694 TRY-0141		codes	20698 TRY-0412		codes	20705 TRY-0027		codes	20707 TRY-0175		codes	20708 TRY-0157		codes	20714 TRY-0130		codes	20715 TRY-0138
APAP	10		ACTS	1		DEFO	1		ACTS	20		ACHA	12		ACHA	3		ACHA	1		ACPG	1		ATPR	1		ACTS	25		ACHA	1		ACTS	3		DEFO	2		DEFO	4		AFRO	3		DEFO	2		AHLM	3
AMRI	2		APAP	1		AAND	2		ALLA	3		AHLT	1		AAPE	1		AAAP	1		ACMF	1		ACRB	1		ABNL	3		AHLT	1		ABNL	1		ACTS	2		ACTS	228					ACTS	6		AISL	1
AAND	6		ABIO	2		ABPO	4		ALNF	1		ACPM	2		ABER	1		AAGU	3		AALM	1		AAMP	3		ACCH	2		ACLT	1		ACCH	1		ACCH	2		APAU	15					ACCH	1
AATA	1		ACPH	2		ABUT	1		AOPA	9		AACS	1		ABFO	1		AAPE	12		AAPE	1		ABIO	1		ACAL	1		APTA	2		AHLT	2		ACHA	1		ACBI	3					AHLM	1
ACPH	1		ACSU	1		ACPH	2					AADA	1		ABVC	1		AAUC	5		ABER	1		ACAL	1		ACBR	1		AACS	1		ABER	1		AHLT	4		ABNL	12					ALHE	1
ACAT	1		ACBO	3		ACTT	9					ABER	2		ABRE	2		ABER	1		ABFO	1		ACBO	1		ADIP	1		AAFF	1		ACAL	1		APTA	2		ACCH	51
ACRO	1		ACLB	2		ACHL	1					ABSB	1		ACAL	6		ABRE	1		ABIO	2		AEXG	1		ADVG	1		AAMP	1		ACLC	1		APGS	2		ACDA	4
ACFU	6		ADEL	1		ACLE	2					ABIC	1		ACHL	1		ACAL	1		ABRE	1		AFIM	1		AECO	1		AAGU	2		ACLB	1		ATPR	1		ACDI	1
ADER	15		AEXG	2		ADLC	5					ABIO	1		ADEA	1		ACAR	1		ACAL	14		AFRE	1		AHAY	2		ACAL	3		ADVG	1		AACA	3		APGS	3
ADEP	20		AECA	1		ADSE	4					ABIN	1		AEEX	3		ACLB	2		ACBO	1		AHAY	1		AHLM	2		ACBY	1		AEXG	1		AAGU	18		ATPR	1
ADET	37		AEXU	4		ADER	4					ACAL	7		AEPU	2		ACOG	1		ACLB	1		ALOM	1		AHGM	1		ADAO	1		AHYE	2		AAPE	46		ACLC	2
ADEV	12		AFAL	22		ADEP	3					ACHL	1		AEUT	1		ADET	1		ADER	1		ALRO	1		AJAK	1		ADVG	1		AHET	28		ABER	3		ACOT	1
AEPI	16		AHAY	1		ADIS	1					ACBO	1		AEXG	17		AEPU	39		ADAN	1		ANIN	1		AFRO	11		AEXG	2		AHLM	7		ACLB	1		ADVG	1
AEXG	114		AHET	1		AHAY	1					ACLB	2		AEXU	1		AEXG	29		ADST	2		AOPA	9		ALRS	1		AECO	4		AHYD	1		ADEN	1		AEPI	4
AESU	4		AHLM	8		AHBI	4					ACOA	3		AFLE	1		AFLE	2		ADUT	1					ALEC	1		AHYE	8		AKOE	1		ADVG	1		AECO	2
AEXO	2		ALFG	1		AMAR	3					ADEF	1		AFAL	1		AFAL	1		AEPU	13					ALTN	2		AHET	1		ALAA	1		AEPI	3		AHLM	2
AEXI	2		ALLA	2		AMRN	1					ADVG	1		AHMI	5		AHYE	1		AEXG	11					AMSA	1		AHLM	7		ALCA	2		AEPU	15		AHYD	1
AHAL	57		ALRO	2		AMIO	1					ADOR	1		AHET	1		AHET	3		AFAL	1					AOPA	4		AHGM	3		ALDM	2		AEXG	1		AJAC	1
AHBI	7		ALBA	1								AEPI	6		AHLM	7		AHLM	13		AHLD	1								AING	1		AFRO	40		AFAL	1		AFRO	3
AHOS	1		AMSO	1								AECO	1		AIMP	1		AHYP	1		AHAY	1								ALCA	2		ALRO	17		AGYS	1		ALBA	1
AHUS	82		AMSA	1								AFAL	1		AIPX	5		AHYD	2		AHYE	1								ALFG	1		ALNI	1		AHYE	3		ALTN	2
AIMP	2		AOTG	2								AHAY	1		AFRO	141		AIMP	1		AHMI	1								ALAR	1		ALEC	1		AHED	1		AMSA	1
AIPX	3		ADOS	4								AHYE	4		ALRO	15		AIPX	1		AHET	2								ALMI	1		ALEM	1		AHEL	4		ANOD	1
AINC	11											AHER	1		ALVD	2		ALFG	5		AHLM	22								ALEW	1		ALLN	1		AHET	11		ADOS	2
ALLA	1											AHET	6		ALHE	4		AFRO	81		AHYD	1								ALTN	3		ALEO	3		AHLM	10		UULN	1
ALRO	1											AHLM	21		ALIF	1		ALLA	1		ALFG	1								AMOD	1		ALHE	8		AHGM	7
ALGB	4											ALFO	1		ALIK	2		ALRO	12		ALFM	1								AOKA	1		ALTN	1		AKOE	1
ALYR	4											ALAA	1		AMAN	1		ALBA	1		AFRO	46								AORI	1		AMAN	2		ALDM	2
AMGM	5											ALBI	4		AMRB	1		ALVD	2		ALRO	11								ADOS	4		AOKA	3		ALAE	1
AMDV	1											ALCA	1		AOTG	2		ALHE	1		ALEL	1											ADOS	1		ALFG	1
AMIS	10											ALGE	2		AOPA	1		ALOR	1		ALES	1														AFRO	2
AMIN	1											AFRO	19		AORI	9		AOTG	2		ALHE	3														ALRO	13
ADOS	1											ALRO	4		ADOS	1		AOPA	6		ALIF	3														ALMI	1
												ALMI	2		ADOM	1		AOST	2		ALIK	54														ALEO	1
												ALVD	1					ADOS	3		ALON	1														ALVD	1
												AMAE	1					ADOM	1		AMGT	1														ALHE	1
												AMAN	3								AMMG	1														ALEW	2
												AMSO	5								AOTG	3														ALNF	1
												AMRO	1								AOPA	14														ALTN	1
												AMDF	1																							AMI1	1
												AMOD	1																							AMOT	1
												ANAT	5																							ANAT	6
												AOST	1																							AOKA	1
												AOKA	1																							AORI	2
												AORI	4																							ADOS	4
												ADOS	14																							ADOM	1
												ADOM	1

## Sheet: Diversity alt alta
codes	18866 TRYB-404
APAP	10
AMRI	2
AAND	6
AATA	1
ACPH	1
ACAT	1
ACRO	1
ACFU	6
ADER	15
ADEP	20
ADET	37
ADEV	12
AEPI	16
AEXG	114
AESU	4
AEXO	2
AEXI	2
AHAL	57
AHBI	7
AHOS	1
AHUS	82
AIMP	2
AIPX	3
AINC	11
ALLA	1
ALRO	1
ALGB	4
ALYR	4
AMGM	5
AMDV	1
AMIS	10
AMIN	1
ADOS	1
codes	18867 TRY-0074
ACTS	1
APAP	1
ABIO	2
ACPH	2
ACSU	1
ACBO	3
ACLB	2
ADEL	1
AEXG	2
AECA	1
AEXU	4
AFAL	22
AHAY	1
AHET	1
AHLM	8
ALFG	1
ALLA	2
ALRO	2
ALBA	1
AMSO	1
AMSA	1
AOTG	2
ADOS	4
codes	18868 TRY-0075
DEFO	1
AAND	2
ABPO	4
ABUT	1
ACPH	2
ACTT	9
ACHL	1
ACLE	2
ADLC	5
ADSE	4
ADER	4
ADEP	3
ADIS	1
AHAY	1
AHBI	4
AMAR	3
AMRN	1
AMIO	1
codes	19772
ACTS	20
ALLA	3
ALNF	1
AOPA	9
codes	19776
ACHA	12
AHLT	1
ACPM	2
AACS	1
AADA	1
ABER	2
ABSB	1
ABIC	1
ABIO	1
ABIN	1
ACAL	7
ACHL	1
ACBO	1
ACLB	2
ACOA	3
ADEF	1
ADVG	1
ADOR	1
AEPI	6
AECO	1
AFAL	1
AHAY	1
AHYE	4
AHER	1
AHET	6
AHLM	21
ALFO	1
ALAA	1
ALBI	4
ALCA	1
ALGE	2
AFRO	19
ALRO	4
ALMI	2
ALVD	1
AMAE	1
AMAN	3
AMSO	5
AMRO	1
AMDF	1
AMOD	1
ANAT	5
AOST	1
AOKA	1
AORI	4
ADOS	14
ADOM	1
codes	19780
ACHA	3
AAPE	1
ABER	1
ABFO	1
ABVC	1
ABRE	2
ACAL	6
ACHL	1
ADEA	1
AEEX	3
AEPU	2
AEUT	1
AEXG	17
AEXU	1
AFLE	1
AFAL	1
AHMI	5
AHET	1
AHLM	7
AIMP	1
AIPX	5
AFRO	141
ALRO	15
ALVD	2
ALHE	4
ALIF	1
ALIK	2
AMAN	1
AMRB	1
AOTG	2
AOPA	1
AORI	9
ADOS	1
ADOM	1
codes	19781
ACHA	1
AAAP	1
AAGU	3
AAPE	12
AAUC	5
ABER	1
ABRE	1
ACAL	1
ACAR	1
ACLB	2
ACOG	1
ADET	1
AEPU	39
AEXG	29
AFLE	2
AFAL	1
AHYE	1
AHET	3
AHLM	13
AHYP	1
AHYD	2
AIMP	1
AIPX	1
ALFG	5
AFRO	81
ALLA	1
ALRO	12
ALBA	1
ALVD	2
ALHE	1
ALOR	1
AOTG	2
AOPA	6
AOST	2
ADOS	3
ADOM	1
codes	19782
ACPG	1
ACMF	1
AALM	1
AAPE	1
ABER	1
ABFO	1
ABIO	2
ABRE	1
ACAL	14
ACBO	1
ACLB	1
ADER	1
ADAN	1
ADST	2
ADUT	1
AEPU	13
AEXG	11
AFAL	1
AHLD	1
AHAY	1
AHYE	1
AHMI	1
AHET	2
AHLM	22
AHYD	1
ALFG	1
ALFM	1
AFRO	46
ALRO	11
ALEL	1
ALES	1
ALHE	3
ALIF	3
ALIK	54
ALON	1
AMGT	1
AMMG	1
AOTG	3
AOPA	14
codes	20679 TRY-0200
ATPR	1
ACRB	1
AAMP	3
ABIO	1
ACAL	1
ACBO	1
AEXG	1
AFIM	1
AFRE	1
AHAY	1
ALOM	1
ALRO	1
ANIN	1
AOPA	9
codes	20690 TRY-0008
ACTS	25
ABNL	3
ACCH	2
ACAL	1
ACBR	1
ADIP	1
ADVG	1
AECO	1
AHAY	2
AHLM	2
AHGM	1
AJAK	1
AFRO	11
ALRS	1
ALEC	1
ALTN	2
AMSA	1
AOPA	4
codes	20694 TRY-0141
ACHA	1
AHLT	1
ACLT	1
APTA	2
AACS	1
AAFF	1
AAMP	1
AAGU	2
ACAL	3
ACBY	1
ADAO	1
ADVG	1
AEXG	2
AECO	4
AHYE	8
AHET	1
AHLM	7
AHGM	3
AING	1
ALCA	2
ALFG	1
ALAR	1
ALMI	1
ALEW	1
ALTN	3
AMOD	1
AOKA	1
AORI	1
ADOS	4
codes	20698 TRY-0412
ACTS	3
ABNL	1
ACCH	1
AHLT	2
ABER	1
ACAL	1
ACLC	1
ACLB	1
ADVG	1
AEXG	1
AHYE	2
AHET	28
AHLM	7
AHYD	1
AKOE	1
ALAA	1
ALCA	2
ALDM	2
AFRO	40
ALRO	17
ALNI	1
ALEC	1
ALEM	1
ALLN	1
ALEO	3
ALHE	8
ALTN	1
AMAN	2
AOKA	3
ADOS	1
codes	20705 TRY-0027
DEFO	2
ACTS	2
ACCH	2
ACHA	1
AHLT	4
APTA	2
APGS	2
ATPR	1
AACA	3
AAGU	18
AAPE	46
ABER	3
ACLB	1
ADEN	1
ADVG	1
AEPI	3
AEPU	15
AEXG	1
AFAL	1
AGYS	1
AHYE	3
AHED	1
AHEL	4
AHET	11
AHLM	10
AHGM	7
AKOE	1
ALDM	2
ALAE	1
ALFG	1
AFRO	2
ALRO	13
ALMI	1
ALEO	1
ALVD	1
ALHE	1
ALEW	2
ALNF	1
ALTN	1
AMI1	1
AMOT	1
ANAT	6
AOKA	1
AORI	2
ADOS	4
ADOM	1
codes	20707 TRY-0175
DEFO	4
ACTS	228
APAU	15
ACBI	3
ABNL	12
ACCH	51
ACDA	4
ACDI	1
APGS	3
ATPR	1
ACLC	2
ACOT	1
ADVG	1
AEPI	4
AECO	2
AHLM	2
AHYD	1
AJAC	1
AFRO	3
ALBA	1
ALTN	2
AMSA	1
ANOD	1
ADOS	2
UULN	1
codes	20708 TRY-0157
AFRO	3
codes	20714 TRY-0130
DEFO	2
ACTS	6
ACCH	1
AHLM	1
ALHE	1
codes	20715 TRY-0138
AHLM	3
AISL	1
codes	20716 TRY-0219
ALLT	1
ACMN	1
codes	20734 TRY-0182
ACTS	1
codes	20735 TRY-0174
ALLO	2
ALOM	2
AMSA	6
codes	Caretta 2014-1
DEFO	17
ACTS	13
ACCH	1
AHLT	1
APTA	3
APGS	1
AALG	1
AAMP	1
AAGU	1
ABAH	1
ABER	42
ABFO	3
ABIA	1
ABIC	3
ABRW	2
ABRU	1
ACAL	1
ACLC	1
ACOA	1
ACGN	5
ACRA	1
ACUR	1
ACVR	1
ADAL	2
ADVG	9
AELG	1
AELI	1
AEPU	1
AFLE	7
AFAL	8
AFRA	3
AHYE	2
AHER	1
AHIR	1
AHLM	52
AHUN	1
AIVE	1
AJAC	1
AKRA	1
AKRD	2
ALAC	1
ALTG	1
ALBI	5
ALCA	28
ALDM	42
ALHA	1
AFRO	80
ALRO	16
ALAR	1
ALNI	1
ALEC	3
ALVD	1
ALHE	1
ALTN	3
AMAX	1
AMI1	1
AMCR	2
AMSR	1
AMDF	2
ANAT	25
AOPA	15
AORI	2
ADOS	6
APRL	1
codes	Caretta 2014-2
DEFO	1
ACTS	2
ACFR	2
APFM	1
ACHA	1
AHLT	1
ACPM	1
APEG	1
APTA	5
APGS	1
AALP	1
AALT	1
AAMP	19
AAGU	1
AAPE	1
AATL	3
AATO	1
AAUE	5
AAVE	1
ABCN	1
ABER	8
ABFO	15
ABIT	2
ABCP	1
ABIC	3
ABRN	1
ABOT	1
ACHB	1
ABOY	1
ABRO	1
ABPA	1
ABLU	1
ACAL	9
ACLC	5
ACHL	1
ACLE	1
ACLB	2
ACVT	2
ACPT	1
ACNT	1
ADEA	1
ADVG	4
ADUT	1
AENG	1
AEXG	1
AEXA	1
AEHS	1
AFEL	7
AFAL	4
AGAN	1
AGRN	1
AGRI	3
AGEL	2
AGIN	1
AGRE	1
AGRU	2
AGYS	1
AHAR	5
AHRV	1
AHRO	1
AHAY	1
AHYE	3
AHDN	1
AHEL	1
AHET	3
AHIR	9
AHLM	73
AHUN	3
AHGM	1
AIPF	1
AIND	1
AINF	1
AIEL	1
AISL	1
AIVE	1
AJAC	4
AJAP	1
AJVN	1
AJOH	2
AKEN	1
AKRZ	1
AKRG	1
ALVA	1
ALDI	4
ALVS	4
ALQU	3
ALBI	1
ALBO	1
ALCA	5
ALDM	9
ALVT	3
ALBP	2
ALKH	5
ALFT	1
ALFG	1
AFRO	334
ALFF	1
ALRO	29
ALRA	3
ALAO	1
ALBA	2
ALRB	1
ALPC	1
ALPP	2
ALNI	1
ALAU	1
ALOB	1
ALLN	1
ALHE	59
ALEW	1
ALNF	1
ALIF	1
ALIN	4
ALCU	1
ALTN	54
AMAN	4
AMER	1
AMAF	1
AMI3	1
AMCR	17
AMJA	2
AMSA	5
AMSD	1
AMTY	1
AMDS	5
AMOL	11
ANAT	1
ANAV	1
ANOL	1
AOMA	1
AOBG	2
AOTG	23
ACOB	4
AOCU	2
AOPA	1
AOKA	1
AORI	1
ADOS	4
ADOT	1
codes	Caretta 2014-3
ACTS	3
ACHA	1
ALCL	1
ACLT	1
ALKE	1
ACMI	1
ACSE	1
ABER	12
ABFO	4
ABIA	1
ACAL	22
ACLC	3
ACHL	2
ACLB	1
ACOA	3
ACGN	3
ADVG	3
ADUT	1
AEPI	1
AEHE	1
AEHS	1
AGEL	1
AGRS	1
AHLD	1
AHLA	1
AHRO	1
AHAY	5
AHYE	15
AHED	1
AHET	5
AHIR	5
AHLM	12
AHLS	1
AHUN	1
AIND	1
AKOA	1
AKOL	2
AKDE	1
AKPR	1
ALBI	25
ALCA	15
ALDM	16
AFRO	7
ALRO	1
ALHE	3
ALJA	1
AMAN	1
AMAX	2
AMSO	2
AMET	1
AMCR	4
AMMA	1
AMSA	2
AMOD	1
AMOL	1
ANAT	2
ANCL	3
AOTG	1
AOAP	1
AOST	1
AOKA	9
AORI	5
ADOS	7
ADOM	3
codes	Caretta 2014-4
DEFO	4
AMGB	1
ACTS	10
APDU	1
ACEN	1
APFR	1
ACHA	5
ACLT	2
ACPM	1
ACPO	1
APEG	1
ACPV	3
APTA	3
ACSA	1
AABU	1
AADT	1
AALP	1
AALG	1
AARH	1
AARR	1
AAUE	1
AAUS	1
ABAH	3
ABPO	2
ABLZ	2
ABER	29
ABFO	1
ABSB	5
ABTH	5
ABIC	1
ABIO	4
ABIP	1
ABCH	2
ABRM	1
ABIS	1
ABPA	1
ABRW	1
ABRK	2
ABLU	4
ABRU	4
ABUC	1
ACAL	120
ACLC	35
ACLD	2
ACAM	2
ACHI	4
ACHL	6
ACBO	38
ACLB	5
ACOA	2
ACGN	2
ACPC	1
ADHA	1
ADEM	1
ADPA	1
ADER	1
ADGI	1
ADVG	9
ADOR	1
ADUT	1
AEPI	2
AEPU	1
AEXA	1
AEHA	4
AEXF	1
AEXL	1
AFAL	7
AFTL	2
AFUL	2
AGBO	1
AGRO	1
AGYS	1
AHAY	40
AHBO	1
AHYE	45
AHET	1
AHBI	1
AHIN	1
AHIR	2
AHLM	140
AHUN	1
AINV	3
AJAP	2
AKEN	1
AKOE	1
AKOA	2
AKRG	1
AKRY	1
AKAF	1
AKDE	1
ALDI	2
ALFR	1
ALAB	1
ALBI	5
ALCA	21
ALDM	17
ALAG	1
ALFM	1
AFRO	37
ALRO	25
ALAR	1
ALBA	1
ALCH	1
ALPP	1
ALLN	2
ALVD	1
ALIL	1
ALIO	2
ALJA	4
ALIP	1
ALTN	6
ALUT	1
AMAN	18
AMAU	2
AMER	3
AMSO	3
AMIC	1
AMIT	2
AMAF	1
AMGR	1
AMIN	2
AMI1	1
AMI2	1
AMI3	1
AMCR	1
AMCG	1
AMIO	1
AMDS	1
AMON	1
AMUE	1
ANAT	12
ANAV	1
ANCL	1
ANTF	1
AOBL	3
AOMA	1
AOGA	1
AOTG	9
ACOB	1
AOPA	2
AOKA	18
AORI	5
ADOS	13
ADOM	1
UULN	1
codes	Caretta 2014-6
ACHA	6
AHLT	4
ACPV	2
ACSE	1
AAND	1
AAPE	1
ABER	17
ABOR	1
ABIN	1
ABRU	2
ACPH	1
ACLB	1
ACGN	7
ACUT	1
AEPI	1
AFAL	3
AHYE	25
AHET	3
AHLM	15
AHPU	2
AJAK	1
AJMA	1
AJVN	1
ALBI	4
ALCA	18
ALDM	5
ALFG	2
AFRO	5
ALRO	4
ALVD	3
ALHE	1
ALEW	1
ALTN	6
AMAN	1
AMCP	1
AMSA	3
AMOL	1
ANAT	7
ANAV	1
AOTG	45
AOPA	3
AORI	4
ADOS	7
ADOM	8
codes	TRC-2300
ACHE	1
ACPM	1
ACSE	1
AABE	1
ABLZ	1
ABIC	1
ACAL	4
ACLC	3
ACSD	1
ACBO	1
ACOA	1
ADNC	1
ADVG	1
AEXG	2
AEXA	1
AGRI	1
AHAY	1
AHUN	1
ALDM	1
AFRO	7
ALIP	1
AMOL	1
ANAT	1
AOCC	1
AOPA	13
codes	TRY-0154
DEFO	1
ACTS	9
ACZA	1
APAU	1
ABNL	2
ACCH	2
ACDE	1
ACFL	1
APFM	1
ACHA	4
AHLT	1
ACJO	1
ACLT	1
ALKE	1
ACPM	1
APTA	2
APGS	3
ATPR	1
ARST	1
ACSE	1
AACA	1
AACD	2
AACS	1
AALT	1
AALG	1
AAMO	1
AAMP	2
AAPE	1
AAUE	1
ABLZ	1
ABER	2
ABFO	5
ABTH	2
ABIC	3
ABIO	1
ABRN	1
ABLU	11
ACAM	1
ACAL	48
ACLC	13
ACAT	1
ACHL	6
ACBO	4
ACLB	1
ACRO	1
ACOA	8
ACBR	1
ACRU	1
ADAU	1
ADFA	1
ADID	1
ADVG	20
ADOR	2
ADUT	1
AELI	5
AEPI	9
AEXA	2
AECA	1
AECO	1
AEXL	1
AEXP	1
AFEL	1
AFAL	11
AFOG	1
AFTN	1
AFTC	1
AFUG	2
AGIB	1
AGON	2
AGRL	1
AGEL	1
AGHY	1
AGYS	4
AHAY	17
AHBO	1
AHYE	6
AHET	50
AHIL	1
AHIR	7
AHLM	15
AHLS	3
AHUN	1
AIVE	1
AJOH	2
AKAF	1
AKDE	13
ALVA	1
ALDI	1
ALAA	1
ALDU	1
ALBI	32
ALCA	204
ALDM	145
ALAE	1
AFRO	33
ALFF	1
ALRO	16
ALAR	1
ALBA	1
ALMI	1
ALPL	1
ALAT	1
ALLC	1
ALEC	6
ALVD	2
ALHE	14
ALEW	12
ALNF	2
ALJA	1
ALIP	3
ALTN	41
ALOO	1
AMAN	5
AMNF	1
AMGT	1
AMSO	3
AMTA	1
AMCS	1
AMNI	1
AMIT	1
AMI3	3
AMCR	4
AMJA	1
AMSA	9
AMIO	1
AMOD	1
AMOL	3
ANIT	1
AORO	1
AOPA	16
AORI	6
ADOS	26
ADOM	9
APRX	1
codes	TRY-0165
ABFO	1
ACAL	2
ADNC	1
ADVG	1
AHAY	1
codes	TRY-0184
ACEN	1
APFR	1
AAMO	1
AAHE	1
AAPA	1
ABAL	1
ABFO	2
ABLU	3
ACAL	40
ACLC	10
ACLD	1
ACAM	1
ACAT	1
ACBO	6
ACOA	2
ACEL	1
ACVG	1
ACRN	1
ADEA	1
ADIL	1
ADVG	11
ADUT	1
AFEL	1
AFTC	1
AFRI	1
AGON	1
AGRM	1
AGRN	1
AGRU	1
AHAY	3
AHET	2
AHLM	1
AKOG	1
AKDE	1
AKUE	1
ALVS	1
ALBI	1
ALCA	6
ALAN	1
ALLO	1
AFRO	2
ALIP	1
ALTN	1
AMAE	1
AMFC	1
AMAN	1
AMGR	1
ADOS	1
ADOM	1
codes	TRY-0438
APAU	1
AALM	1
AARE	1
ABIO	1
ACAL	1
ACLC	1
ACBO	1
ACOT	1
AECA	1
AHAY	1
AHST	1
AHLM	1
AFRO	1
AMIT	1
AMSA	1
codes	TRY-0439
ACZA	1
ABNL	1
AFMI	1
ACHA	1
APHA	1
AHLT	1
ACLT	1
ATPR	1
ACSE	1
AAMO	1
ABCL	1
ABER	3
ABFO	6
ABSU	2
ABAN	1
ABRK	2
ABLU	1
ABUC	1
ACAM	1
ACAL	25
ACLC	9
ACBO	2
ACRO	2
ACSI	1
ACON	1
ACVR	1
ACYC	2
ADNC	4
ADEA	1
ADVG	4
ADUT	1
AETA	1
AEXA	1
AECA	1
AFLE	2
AFRI	1
AGER	1
AGES	1
AGRI	1
AGRO	1
AGYS	1
AHAU	1
AHAY	4
AHBO	1
AHYE	1
AHET	1
AHIM	1
AHLM	4
AHUN	3
AHTR	2
AIND	1
AJVN	1
ALAA	1
ALTG	2
ALBI	2
ALCA	3
AFRO	12
ALRO	8
ALSR	1
ALAP	1
ALEC	1
ALHE	9
ALEW	1
AMAN	1
AORO	1
ADOS	1
ADOM	2
APAM	1
codes	TRY-0442
ACHE	1
ABER	1
ABFO	1
ABLU	1
ACAL	4
ACLC	1
ACLB	1
ACOT	1
ADVG	6
AGRI	1
AGIN	1
AHAE	1
AHAY	1
AIFG	1
AKUW	1
codes	TRY-0451
ADVG	1
AGEL	1
codes	TRY-0452
ACAL	1
ACBO	1
AFTL	4
AMIT	1
codes	TRY-0457
ACHE	1
ACSE	1
AALM	1
ABPO	1
ABER	3
ABFO	1
ABIC	1
ABIP	1
ABLU	1
ABUC	1
ACAL	10
ACLC	4
ACBO	2
ACLB	2
ACRO	1
ACGN	1
ADEN	1
ADVG	4
ADUT	2
AGRU	1
AGYS	1
AHAY	3
AHYE	1
AHPU	1
AJOU	1
ALAK	1
ALVU	1
ALCA	1
ALFG	1
AFRO	6
ALRO	5
ALBA	1
ALTI	1
ALHE	2
ALTN	1
AMAN	1
AMSC	1
AMSA	1
ANAN	1
ANIT	1
AOLA	2
ADOS	31
ADOM	4
codes	TRY-0467
ACHA	3
AHLT	1
ACPV	1
AACS	1
AALT	1
AATI	1
ABCL	1
ABLZ	1
ABER	1
ABFO	5
ABIC	1
ABIO	1
ABAN	1
ACAL	22
ACLC	6
ACHL	1
ACBO	3
ACLB	2
ACOA	2
ACGN	4
ACUT	1
ADVG	4
AGRN	1
AGYS	3
AHRO	2
AHAY	8
AHBO	1
AHLM	3
ALCN	1
ALVN	2
ALAA	1
ALCA	1
ALDM	1
ALRO	2
ALMI	1
AMAN	1
AMET	1
AMCS	1
AMOL	1
ANAT	1
AOLA	1
AOKA	1
ADOS	10
ADOM	1

## Sheet: Taxa codes-cell counts
	codes	18866 TRYB-404	18867 TRY-0074	18868 TRY-0075	19772	19776	19780	19781	19782	20679 TRY-0200	20690 TRY-0008	20694 TRY-0141	20698 TRY-0412	20705 TRY-0027	20707 TRY-0175	20708 TRY-0157	20714 TRY-0130	20715 TRY-0138	20716 TRY-0219	20734 TRY-0182	20735 TRY-0174	Caretta 2014-1	Caretta 2014-2	Caretta 2014-3	Caretta 2014-4	Caretta 2014-6	TRC-2300	TRY-0154	TRY-0165	TRY-0184	TRY-0438	TRY-0439	TRY-0442	TRY-0451	TRY-0452	TRY-0457	TRY-0467
Achnanthes brevipes	DEFO			1										2	4		2					17	1		4			1										32
Achnanthes brevipes var. intermedia	AMGB																								1													1
Achnanthes elongata	ACTS		1		20						25		3	2	228		6			1		13	2	3	10			9										323
Achnanthes cf. fimbriata	ACZA																											1				1						2
Achnanthes fogedii	APAP	10	1																																			11
Achnanthes cf. groenlandica var. phinneyi	APAU														15													1			1							17
Achnanthes parvula	ACBI														3																							3
Achnanthes pseudogroenlandica	ABNL										3		1		12													2				1						19
Achnanthes squaliformis	ACCH										2		1	2	51		1					1						2										60
Achnanthes sp.1	ACDA														4																							4
Achnanthes sp.2	ACDE																											1										1
Achnanthes sp.3	ACDI														1																							1
Amphicocconeis disculoides	APDU																								1													1
Amphora arcuata	ACEN																								1					1								2
Amphora bigibba var. interrupta	ACFL																											1										1
Amphora cymbamphora	ACFR																						2															2
Amphora cf. egregia	APFR																								1					1								2
Amphora fluminensis	APFM																						1					1										2
Amphora graeffeana	AFMI																															1						1
Amphora hyalina	ACPG								1																													1
Amphora marina	ACHA					12	3	1				1		1									1	1	5	6		4				1					3	39
Amphora montgomeryi	APHA																															1						1
Amphora pediculus	ACHE																										1						1			1		3
Amphora polita	AHLT					1						1	2	4								1	1			4		1				1					1	17
Amphora proteus var. contigua	ACJO																											1										1
Amphora proteus var. oculata	ALCL																							1														1
Amphora sp.1	ACLT											1												1	2			1				1						6
Amphora sp.2	ALKE																							1				1										2
Amphora sp.3	ACMF								1																													1
Amphora sp.4	AMRI	2																																				2
Amphora sp.5	ACMI																							1														1
Amphora sp.6	ACPM					2																	1		1		1	1										6
Amphora sp.7	ACPO																								1													1
Amphora sp.8	APEG																						1		1													2
Amphora sp.9	ACPV																								3	2											1	6
Amphora sp.10	APTA											2		2								3	5		3			2										17
Amphora sp.11	APGS													2	3							1	1					3										10
Amphora sp.12	ATPR									1				1	1													1				1						5
Amphora sp.13	ACRB									1																												1
Amphora sp.14	ARST																											1										1
Amphora sp.15	ACSA																								1													1
Amphora sp.16	ACSE																							1		1	1	1				1				1		6
Amphora sp.17	AAAP							1																														1
Amphora sp.18	AABU																								1													1
Amphora sp.19	AABE																										1											1
Amphora sp.20	AACA													3														1										4
Amphora sp.21	AACD																											2										2
Amphora sp.22	AACS					1						1																1									1	4
Amphora sp.23	AADA					1																																1
Amphora sp.24	AADT																								1													1
Amphora sp.25	AAFF											1																										1
Amphora sp.26	AALP																						1		1													2
Amphora sp.27	AALT																						1					1									1	3
Anaulus minutus	AALM								1																						1					1		3
Anorthoneis sp.1	AALG																					1			1			1										3
Astartiella sp.1	AAMO																											1		1		1						3
Berkeleya fennica	AAMP									3		1										1	19					2										26
Biremis lucens	AAND	6		2																						1												9
Brachysira aponina	AAGU							3				2		18								1	1															25
Brachysira estonarium	AAPE						1	12	1					46									1			1		1										63
Brachysira sp.1	AAUC							5																														5
Brockmaniella tethys	AARH																								1													1
Caloneis aemula	AATI																																				1	1
Caloneis cf. excentrica	AARR																								1													1
Caloneis cf. liber	AARE																														1							1
Chamaeppinnularia clamans	AATA	1																																				1
Chelonicola sp.1	AATL																						3															3
Cistula lorenziana	AATO																						1															1
Climaconeis spp.	AAUE																						5		1			1										7
Cocconeisopsis cf. regularis	AAUS																								1													1
Cocconeiopsis sp.1	AAHE																													1								1
Cocconeiopsis sp.2 (nov?)	AAPA																													1								1
Cocconeis britannica	AAVE																						1															1
Cocconeis clandestina	ABAH																					1			3													4
Cocconeis cf. distans	ABCL																															1					1	2
Cocconeis krammeri	ABCN																						1															1
Cocconeis latecostata	ABPO			4																					2											1		7
Cocconeis peltoides	ABLZ																								2		1	1									1	5
Cocconeis pinnata	ABAL																													1								1
Cocconeis placentula	ABER					2	1	1	1				1	3								42	8	12	29	17		2				3	1			3	1	127
Cocconeis scutellum	ABFO						1		1													3	15	4	1			5	1	2		6	1			1	5	46
Cocconeis sp.1	ABSB					1																			5													6
Cocconeis sp.2	ABTH																								5			2										7
Cocconeis sp.3	ABIT																						2															2
Cocconeis sp.4	ABIA																					1		1														2
Cocconeis sp.5	ABSU																															2						2
Cocconeis sp.6	ABCP																						1															1
Cocconeis sp.7	ABIC					1																3	3		1		1	3								1	1	14
Cocconeis sp.8	ABIO		2			1			2	1															4			1			1						1	13
Cocconeis sp.9	ABIP																								1											1		2
Cocconeis sp.10	ABCH																								2													2
Cocconeis sp.11	ABOR																									1												1
Cocconeis sp.12	ABRN																						1					1										2
Cocconeis sp.13	ABOT																						1															1
Cocconeis sp.14	ACHB																						1															1
Cocconeis sp.15	ABOY																						1															1
Cocconeis sp.16	ABRM																								1													1
Cocconeis sp.17	ABRO																						1															1
Cocconeis sp.18	ABVC						1																															1
Cocconeis sp.19	ABRE						2	1	1																													4
Cocconeis sp.20	ABIN					1																				1												2
Cocconeis sp.21	ABIS																								1													1
Cocconeis sp.22	ABPA																						1		1													2
Cocconeis sp.23	ABAN																															1					1	2
Cyclotella meneghiniana	ABRW																					2			1													3
Cymatosira belgica	ABRK																								2							2						4
Cymatosira lorenziana	ABLU																						1		4			11		3		1	1			1		22
Cymbella excisa	ABRU																					1			4	2												7
Cymbella excisa var. procera	ABUC																								1							1				1		3
Cymbella excisiformis	ABUT			1																																		1
Delphineis cf. surirella var. australis	ACAM																											1				1						2
Delphineis surirella var. australis	ACAL					7	6	1	14	1	1	3	1									1	9	22	120		4	48	2	40	1	25	4		1	10	22	343
Delphineis sp.1	ACLC												1		2							1	5	3	35		3	13		10	1	9	1			4	6	94
Delphineis sp.2	ACLD																								2					1								3
Delphineis sp.3 (nov)	ACAM																								2					1								3
Denticula subtilis	ACPH	1	2	2																						1												6
Denticula sp.1	ACAR							1																														1
Diatoma tenuis	ACSD																										1											1
Dickieia cf. ulvaceae	ACAT	1																										1		1								3
Dickieia sp.1	ACTT			9																																		9
Dickieia sp.2	ACHI																								4													4
Dimeregramma minus	ACSU		1																																			1
Dimmeregramma minus var. nanum	ACHL			1		1	1																1	2	6			6									1	19
Diplomenora cocconeiformis	ACBO		3			1			1	1															38		1	4		6	1	2			1	2	3	64
Diploneis aestuari	ACLE			2																			1															3
Diploneis bombus	ACLB		2			2		2	1				1	1									2	1	5	1		1					1			2	2	24
Diploneis caffra	ACRO	1																										1				2				1		5
Diploneis coffaeiformis	ACOA					3																1		3	2		1	8		2							2	22
Diploneis crabro	ACEL																													1								1
Diploneis cf. decipiens var. paralella	ACSI																															1						1
Diploneis cf. litoralis var. clathrata	ACOG							1																														1
Diploneis cf. mirabilis	ACGN																					5		3	2	7										1	4	22
Diploneis cf. parca	ACFU	6																																				6
Diploneis incurvata var. dubia	ACON																															1						1
Diploneis papula	ACBR										1																	1										2
Diploneis smithii	ACPC																								1													1
Diploneis suborbicularis var. constricta	ACOT														1																1		1					3
Diploneis subsincta	ACVG																													1								1
Diploneis vacillians var. renitens	ACVT																						2															2
Diploneis weissflogi	ACPT																						1															1
Diploneis sp.1	ACRA																					1																1
Diploneis sp.2	ACRN																													1								1
Diploneis sp.3	ACBY											1																										1
Diploneis sp.4	ACRU																											1										1
Diploneis sp.5	ACNT																						1															1
Diploneis sp.6	ACUR																					1																1
Diploneis sp.7	ACUT																									1											1	2
Diploneis sp.8	ACVR																					1										1						2
Diploneis sp.9	ACYC																															2						2
Encyonema minutum	ADNC																										1		1			4						6
Entomoneis cf. paludosa	ADAO											1																										1
Epithemia argus	ADAU																											1										1
Epithemia goeppertiana	ADAL																					2																2
Epithemia smithii	ADEF					1																																1
Eunotogramma cf. litorale	ADFA																											1										1
Fallacia cassubiae	ADLC			5																																		5
Fallacia cf. schoemaniana	ADEL		1																																			1
Fallacia cf. spatiata	ADHA																								1													1
Fallacia florinae	ADSE			4																																		4
Fallacia forcipata	ADEA						1																1							1		1						4
Fallacia litoricola	ADEM																								1													1
Fallacia nyella	ADPA																								1													1
Fallacia oculiformis	ADER	15		4					1																1													21
Fallacia scharefae	ADEN													1																						1		2
Fallacia subforcipata	ADEP	20		3																																		23
Fallacia sp.1	ADET	37						1																														38
Fallacia sp.2	ADEV	12																																				12
Fallacia sp.3	ADID																											1										1
Fallacia sp.4	ADGI																								1													1
Fogedia finmarchia	ADIL																													1								1
Fogedia giffeniana	ADIP										1																											1
Fogedia sp.1	ADIS			1																																		1
Fragilaria cf. bronkei	ADAN								1																													1
Fragilaria hyalina	ADST								2																													2
Grammatophora angulosa	ADVG					1					1	1	1	1	1							9	4	3	9		1	20	1	11		4	6	1		4	4	83
Grammatophora angulosa var. mediterranea	ADOR					1																			1			2										4
Grammatophora oceanica	ADUT								1														1	1	1			1		1		1				2		9
Gyrosigma balticum	AETA																															1						1
Gyrosigma eximum	AELG																					1																1
Gyrosigma wansbeckii	AELI																					1						5										6
Halamphora acutiuscula	AEPI	16				6								3	4									1	2	1		9										42
Halamphora cf. pseudoholsatica	AEEX						3																															3
Halamphora luciae	AEPU						2	39	13					15								1			1													71
Halamphora subangularis	AENG																						1															1
Halamphora subholsatica	AEUT						1																															1
Halamphora tenerrima	AEXG	114	2				17	29	11	1		2	1	1									1				2											181
Halamphora turgida	AEXA																						1		1		1	2				1						6
Halamphora wisei	AECA		1																									1			1	1						4
Halamphora sp.1	AECO					1					1	4			2													1										9
Halamphora sp.2	AEHA																								4													4
Haslea spicula	AEHE																							1														1
Hendeyella dubia	AEHS																						1	1														2
Hippodonta subtilissima	AESU	4																																				4
Hippodonta sp.1	AEXU		4				1																															5
Hippodonta sp.2	AEXF																								1													1
Hippodonta sp.3	AEXO	2																																				2
Hippodonta sp.4	AEXI	2																																				2
Hyalodiscus scoticus	AEXL																								1			1										2
Hyalosynedra hyalina	AEXP																											1										1
Hyalosynedra cf. sublaevigata	AFEL																						7					1		1								9
Hyalosynedra sp.1	AFIM									1																												1
Karayevia amoena	AFLE						1	2														7										2						12
Karayevia submarina	AFAL		22			1	1	1	1					1								8	4		7	3		11										60
Licmophora cf. hyalina	AFOG																											1										1
Licmophora proboscidea	AFTN																											1										1
Licmophora sp.	AFTC																											1		1								2
Lindavia balatonis	AFTL																								2										4			6
Luticola nivalis	AFRA																					3																3
Lyrella abrupta	AFRE									1																												1
Lyrella amphoroides	AFRI																													1		1						2
Lyrella hennedyi	AFUG																											2										2
Lyrella lyra	AFUL																								2													2
Lyrella lyra var. intermedia	AGER																															1						1
Lyrella majuscula	AGES																															1						1
Mastogloia adriatica	AGAN																						1															1
Mastogloia aff. quintecostata	AGIB																											1										1
Mastogloia angusta	AGBO																								1													1
Mastogloia binotata	AGON																											2		1								3
Mastogloia biocellata	AGRM																													1								1
Mastogloia cf. pumila	AGRL																											1										1
Mastogloia corsiciana	AGRN																						1							1							1	3
Mastogloia crucicula	AGRI																						3				1					1	1					6
Mastogloia crucicula var. alternans Zanon	AGEL																						2	1				1						1				5
Mastogloia cunneata	AGHY																											1										1
Mastogloia decipiens	AGIN																						1										1					2
Mastogloia decussata	AGRS																							1														1
Mastogloia exilis	AGRE																						1															1
Mastogloia lanceolata	AGRO																								1							1						2
Mastogloia ovalis	AGRU																						2							1						1		4
Mastogloia pusilla var. pusilla	AGYS													1									1		1			4				1				1	3	12
Mastogloia sp.1	AHLD								1															1														2
Mastogloia sp.2	AHAR																						5															5
Mastogloia sp.3	AHRV																						1															1
Mastogloia sp.4	AHLA																							1														1
Mastogloia sp.5	AHAU																															1						1
Mastogloia sp.6	AHAE																																1					1
Mastogloia sp.7	AHRO																						1	1													2	4
Meloneis mimallis	AHAY		1	1		1			1	1	2												1	5	40		1	17	1	3	1	4	1			3	8	92
Meloneis sp.1	AHBO																								1			1				1					1	4
Melosira moniliformis	AHYE					4		1	1			8	2	3								2	3	15	45	25		6				1				1		117
Navicula arenaria var. rostellata	AHED													1										1														2
Navicula athenae	AHDN																						1															1
Navicula cf. borowkae	AHAL	57																																				57
Navicula cf. vekhovii	AHMI						5		1																													6
Navicula duerrenbergiana	AHEL													4									1															5
Navicula flanatica	AHER					1																1																2
Navicula normaloides	AHET		1			6	1	3	2			1	28	11									3	5	1	3		50		2		1						118
Navicula palpebralis	AHBI	7		4																					1													12
Navicula palpebralis var. angulosa	AHST																														1							1
Navicula cf. palpebralis var. minor	AHIL																											1										1
Navicula cf. palpebralis var. undulata	AHIM																															1						1
Navicula palpebralis sp.1(nov)	AHIN																								1													1
Navicula pavillardii	AHIR																					1	9	5	2			7										24
Navicula perminuta	AHLM		8			21	7	13	22		2	7	7	10	2		1	3				52	73	12	140	15		15		1	1	4					3	419
Navicula ponticula	AHOS	1																																				1
Navicula ramosissima	AHLS																							1				3										4
Navicula reichardtiana	AHPU																									2										1		3
Navicula salinicola	AHUN																					1	3	1	1		1	1				3						11
Navicula subagnita	AHGM										1	3		7									1															12
Navicula tripunctata	AHTR																															2						2
Navicula viminoides	AHUS	82																																				82
Navicula sp.1	AHYP							1																														1
Navicula sp.2	AHYD							2	1				1		1																							5
Navicula sp.3	AIMP	2					1	1																														4
Navicula sp.4	AIPX	3					5	1																														9
Navicula sp.5	AIPF																						1															1
Navicula sp.6	AINC	11																																				11
Navicula sp.7	AIND																						1	1								1						3
Navicula sp.8	AINF																						1															1
Navicula sp.9	AIEL																						1															1
Navicula sp.10	AIFG																																1					1
Navicula sp.11	AING											1																										1
Navicula sp.12	AINV																								3													3
Navicula sp.13	AISL																	1					1															2
Navicula sp.14	AIVE																					1	1					1										3
Navicula sp.15	AJAC														1							1	4															6
Navicula sp.16	AJAK										1															1												2
Navicula sp.17	AJMA																									1												1
Navicula sp.18	AJAP																						1		2													3
Navicula sp.19	AJVN																						1			1						1						3
Navicula sp.20	AJOH																						2					2										4
Navicula sp.21	AJOU																																			1		1
Navicula sp.22	AKEN																						1		1													2
Navicula sp.23	AKOE												1	1											1													3
Navicula sp.24	AKOA																							1	2													3
Navicula sp.25	AKOG																													1								1
Navicula sp.26	AKOL																							2														2
Navicula sp.27	AKRZ																						1															1
Navicula sp.28	AKRA																					1																1
Navicula sp.29	AKRG																						1		1													2
Navicula sp.30	AKRY																								1													1
Navicula sp.31	AKAF																								1			1										2
Navicula sp.32	AKDE																							1	1			13		1								16
Navicula sp.33	AKPR																							1														1
Navicula sp.34	AKRD																					2																2
Navicula sp.35	AKUE																													1								1
Navicula sp.36	AKUW																																1					1
Navicula sp.37	ALAC																					1																1
Navicula sp.38	ALFO					1																																1
Navicula sp.39	ALCN																																				1	1
Navicula sp.40	ALAK																																			1		1
Navicula sp.41	ALVU																																			1		1
Navicula sp.42	ALVA																						1					1										2
Navicula sp.43	ALDI																						4		2			1										7
Navicula sp.44	ALVS																						4							1								5
Navicula sp.45	ALQU																						3															3
Navicula sp.46	ALVN																																				2	2
Navicula sp.47	ALAA					1							1															1				1					1	5
Navicula sp.48	ALFR																								1													1
Navicula sp.49	ALTG																					1										2						3
Navicula sp.50	ALDU																											1										1
Navicula sp.51	ALAB																								1													1
Navicula sp.52	ALBI					4																5	1	25	5	4		32		1		2						79
Navicula sp.53	ALBO																						1															1
Navicula sp.54	ALCA					1						2	2									28	5	15	21	18		204		6		3				1	1	307
Navicula sp.55	ALDM												2	2								42	9	16	17	5	1	145									1	240
Navicula sp.56	ALAE													1														1										2
Navicula sp.57	ALGE					2																																2
Navicula sp.58	ALAG																								1													1
Navicymbula pusilla var. lata	ALHA																					1																1
Neohuttonia reichardtiana	ALAN																													1								1
Neosynedra provincialis	ALLO																				2									1								3
Neosynedra sp.1	ALOM									1											2																	3
Nitzschia amabilis	ALVT																						3															3
Nitzschia cf. aquorea	ALBP																						2															2
Nitzschia cf. distans	ALKH																						5															5
Nitzschia cf. plioveterana	ALFT																						1															1
Nitzschia elegantula	ALFG		1					5	1			1		1									1			2										1		13
Nitzschia filiformis	ALFM								1																1													2
Nitzschia frustulum	AFRO					19	141	81	46		11		40	2	3	3						80	334	7	37	5	7	33		2	1	12				6		870
Nitzzschia grossestriata	ALFF																						1					1										2
Nitzschia inconspicua	ALLA	1	2		3			1																														7
Nitzschia liebertruthii	ALRO	1	2			4	15	12	11	1			17	13								16	29	1	25	4		16				8				5	2	182
Nitzschia lorenziana	ALRA																						3															3
Nitzschia nana	ALAR											1										1			1			1										4
Nitzschia normannii	ALAO																						1															1
Nitzschia pararostrata	ALBA		1					1							1								2		1			1								1		8
Nitzschia parvula	ALEL								1																													1
Nitzschia sigma	ALMI					2						1		1														1									1	6
Nitzschia valdestriata	ALRB																						1															1
Nitzschia volvendirostrata	ALLT																		1																			1
Nitzschia sp.1	ALPC																						1															1
Nitzschia sp.2	ALPL																											1										1
Nitzschia sp.3	ALSR																															1						1
Nitzschia sp.4	ALCH																								1													1
Nitzschia sp.5	ALAP																															1						1
Nitzschia sp.6	ALPP																						2		1													3
Nitzschia sp.7	ALNI												1									1	1															3
Nitzschia sp.8	ALRS										1																											1
Nitzschia sp.9	ALAT																											1										1
Nitzschia sp.10	ALLC																											1										1
Nitzschia sp.11	ALTI																																			1		1
Nitzschia sp.12	ALAU																						1															1
Nitzschia sp.13	ALEC										1		1									3						6				1						12
Nitzschia sp.14	ALEM												1																									1
Nitzschia sp.15	ALOB																						1															1
Nitzschia sp.16	ALLN												1										1		2													4
Nitzschia sp.17	ALEO												3	1																								4
Nitzschia sp.18	ALES								1																													1
Nitzschia sp.19	ALVD					1	2	2						1								1			1	3		2										13
Nitzschia sp.20	ALHE						4	1	3				8	1			1					1	59	3		1		14				9				2		107
Nitzschia sp.21	ALEW											1		2									1			1		12				1						18
Nitzschia sp.22	ALIL																								1													1
Nitzschia sp.23	ALNF				1									1									1					2										5
Nitzschia sp.24	ALIF						1		3														1															5
Nitzschia sp.25	ALIO																								2													2
Nitzschia sp.26	ALIN																						4															4
Nitzschia sp.27	ALCU																						1															1
Odontella aurita	ALJA																							1	4			1										6
Odontella rostrata	ALIP																								1		1	3		1								6
Olifantiella cf. seblae	ALIK						2		54																													56
Olifantiella sp.1	ALTN										2	3	1	1	2							3	54		6	6		41		1						1		121
Opephora buchardiae	ALGB	4																																				4
Opephora cf. minuta	ALON								1																													1
Opephroa cf. mutabilis	ALOO																											1										1
Opephora guenter-grassi	ALOR							1																														1
Opephora marina	ALUT																								1													1
Opephora mutabilis	ALYR	4																																				4
Opephora pacifica	AMAE					1																								1								2
Pantocsekiella ocellata	AMFC																													1								1
Paralia sulcata	AMAN					3	1						2										4	1	18	1		5		1		1				1	1	39
Parlibellus cf. calvus	AMNF																											1										1
Parlibellus berkeleyi	AMGT								1																			1										2
Parlibellus sp.1	AMAR			3																																		3
Parlibellus sp.2	AMGM	5																																				5
Parlibellus sp.3	AMRN			1																																		1
Parlibellus sp.4	AMAU																								2													2
Petrodictyon gemma	AMAX																					1		2														3
Petroneis humerosa	AMDV	1																																				1
Petroneis marina	AMER																						1		3													4
Pinnularia yarensis	AMSO		1			5																		2	3			3										14
Pinnularia claviculus	AMTA																											1										1
Plagiogramma cf. pulchellum	AMET																							1													1	2
Plagiogrammopsis sigmodea	AMMG								1																													1
Plagiotropis cf. lepidoptera	AMIC																								1													1
Plagiotropis sp.1	AMCS																											1									1	2
Planothidium cf. campechianum	AMCP																									1												1
Planothidium delicatulum	AMNI																											1										1
Planothidium depertidum	AMIS	10																																				10
Planothidium lanceolatum	AMSC																																			1		1
Planothidium lilljeborgei	AMIT																								2			1			1				1			5
Planothidium sp.1	AMAF																						1		1													2
Planothidium sp.2	AMGR																								1					1								2
Planothidium sp.3	AMIN	1																							2													3
Pleurosigma cf. elongatum	AMI1													1								1			1													3
Pleurosigma cf. strigosum	AMI2																								1													1
Psammodictyon mediterraneum	AMI3																						1		1			3										5
Psammodictyon panduriforme var. continuum	AMCR																					2	17	4	1			4										28
Psammodictyon panduriforme var. delicatulum	AMRO					1																																1
Psammodictyon panduriforme var. minima	AMJA																						2					1										3
Psammodictyon roridum	AMMA																							1														1
Psammodictyon rudum	AMSA		1								1				1						6		5	2		3		9			1					1		30
Psammodictyon sp.1	AMSD																						1															1
Psammodictyon sp.2	AMSR																					1																1
Psammodictyon sp.3	AMCG																								1													1
Psammodictyon sp.4	AMTY																						1															1
Psammodiscus nitidus	AMIO			1																					1			1										3
Pseudostaurosiropsis geocollegarum	AMRB						1																															1
Rhoicosphenia abbreviata	ACMN																		1																			1
Rhoicosphenia cf. adriatica	AMDS																						5		1													6
Rhopalodia acuminata	AMDF					1																2																3
Rhopalodia musculus	AMOD					1						1												1				1										4
Rhopalodia pacifica	AMOL																						11	1		1	1	3									1	18
Rhopalodia sp.1	AMON																								1													1
Rhopalodia sp.2	AMOT													1																								1
Rhopalodia sp.3	AMUE																								1													1
Seminavis robusta	ANAN																																			1		1
Seminavis strigosa	ANAT					5								6								25	1	2	12	7	1										1	60
Seminavis sp.1	ANAV																						1		1	1												3
Seminavis sp.2	ANCL																							3	1													4
Seminavis sp.3	ANIN									1																												1
Seminavis sp.4	ANIT																											1								1		2
Staurosira sp.1	ANTF																								1													1
Striatella unipunctata	ANOD														1																							1
Surirella atomus	ANOL																						1															1
Surirella curvifacies	AOBL																								3													3
Surirella fastuosa	AOMA																						1		1													2
Surirella striatula	AOGA																								1													1
Surirella sp.1	AOBG																						2															2
Tabularia fasciculata	AOTG		2				2	2	3														23	1	9	45												87
Tabularia tabulata	ACOB																						4		1													5
Tetramphora lineolata	AOCC																										1											1
Thalassionema sp.1	AOCU																						2															2
Toxodinea insignis	AORO																											1				1						2
Trachysphenia australis var. australis	AOLA																																			2	1	3
Trachysphenia australis var. rostellata	AOAP																							1														1
Tripterion sp.2	AOPA				9		1	6	14	9	4											15	1		2	3	13	16										93
Tryblionella compressa var. compressa	AOST					1		2																1														4
Tryblionella compressa var. elongata	AOKA					1						1	3	1									1	9	18												1	35
Tryblionella constrictra	AORI					4	9					1		2								2	1	5	5	4		6										39
Tryblionella granulata	ADOS	1	4			14	1	3				4	1	4	2							6	4	7	13	7		26		1		1				31	10	140
Tryblionella lanceola	ADOM					1	1	1						1										3	1	8		9		1		2				4	1	33
Tryblionella levidensis	ADOT																						1															1
Tryblionella navicularis	APAM																															1						1
Tryblionella sp.1	APRL																					1																1
Tryblionella sp.2	APRX																											1										1
Ulnaria ulna	UULN														1										1													2
		441	66	49	33	154	243	241	225	24	61	58	136	190	347	3	11	4	2	1	10	437	891	238	860	228	49	969	6	125	15	159	23	2	7	109	109	6526
		6.75	1.18	0.75	0.5	2.35	3.72	3.69	3.44	0.36	0.93	0.88	2.08	2.91	5.31	0.04	0.16	0.06	0.03	0.01	0.15	6.69	13.65	3.64	13.17	3.49	0.75	14.84	0.09	1.91	0.22	2.43	0.35	0.03	0.1	1.67	1.67
