# Supplementary material for: Biodiversity of carapace epibiont diatoms in loggerhead sea turtles (Caretta caretta Linnaeus 1758) in the Aegean Sea Turkish coast
Source: PeerJ journal article supplement (doi:10.7717/peerj.9406), 2020-07-17
Supplement: Supplemental_Tables.pdf [file Supplemental_Tables.pdf]

**Table S1. A list of the taxa observed from the carapace of *C. caretta* between 2011-2014.**

*Cyclotella meneghiniana* Kützing 1844  
*Pantocsekiella ocellata* (Pantocsek) K.T. Kiss & Ács 2016  
*Melosira moniliformis* (O. F. Müller) Agardh 1824  
*Hyalodiscus scoticus* (Kützing) Grunow 1879  
*Paralia cf. sulcata* (Ehrenberg) Cleve 1873  
*Lindavia balatonis* (Pantocsek) Nakov *et al.* 2015  
*Odontella aurita* Agardh 1832  
*Odontella rostrata* (Hustedt) Simonsen 1987  
*Dimeregramma minus* (Gregory) Ralfs 1861  
*Dimeregramma minus var. nanum* (Gregory) Van Heurck 1896  
*Dimeregramma* sp.  
*Plagiogramma cf. pulchellum var. pygmaeum* (Greville) H. Peragallo & M. Peragallo 1901  
*Brockmaniella brockmannii* (Hustedt) Hasle, Stosch & Syvertsen 1983  
*Neohuttonia reichardtii* (Grunow) Hustedt 1898  
*Plagiogramma tenuissimum* Hustedt 1956  
*Anaulus balticus* Simonsen 1959  
*Cymatosira belgica* Grunow 1881  
*Cymatosira lorenziana* Grunow 1862  
*Diatoma tenuis* Agardh 1812  
*Fragilaria bronkei* A. Witkowski, H. Lange-Bertalot & D. Metzeltin 2000  
*Fragilaria hyalina* (Kützing) Grunow 1862  
*Hendeyella dubia* (Grunow) Chunlian Li, Witkowski & Ashworth 2016  
*Hyalosynedra hyalina* (Grunow) I. Álvarez-Blanco & S. Blanco 2014  
*Hyalosynedra cf. sublaevigata* Blanco & Blanco 2014  
*Hyalosynedra* sp.  
*Neosynedra provincialis* (Grunow) Williams & Round 1986  
*Opephora burchardtia* Witkowski, Metzeltin & Lange-Bertalot 1998  
*Opephora cf. guenter-grassii* (Witkowski & Lange-Bertalot) Sabbe & Vyvermann 1995  
*Opephora minuta* (Cleve-Euler) Witkowski, Lange-Bertalot & Metzeltin 2000  
*Opephora marina* (Gregory) Petit 1888  
*Opephora mutabilis* (Grunow) Sabbe & Vyverman 1995  
*Opephora pacifica* (Grunow) Petit 1888

*Tabularia fasciculata* (Agardh) Williams & Round 1986  
*Tabularia tabulata* (Agardh) Snoeijs 1992  
*Trachysphenia australis* var. *australis* Petit 1877  
*Trachysphenia australis* var. *rostellata* Hustedt 1955  
*Ulnaria ulna* (Nitzsch) Compère 2001  
*Pseudostaurosiroopsis geocollegarum* (Witkowski) E. A. Morales 2002  
*Staurosira* sp.  
*Licmophora* cf. *hyalina* (Kützing) Grunow 1867  
*Licmophora proboscidea* Mereschkowsky 1902  
*Licmophora* spp.  
*Psammodiscus nitidus* (Gregory) Round & Mann 1980  
*Delphineis australis* (P. Petit) Watanabe *et al.* 2013  
*Delphineis* sp.  
*Diplomenora cocconeiformis* (Schmidt) Blazé 1984  
*Meloneis mimallis* I.Louvrou, D.B.Danielidis & A.Economou-Amilli 2013  
*Meloneis* sp.  
*Thalassionema* sp.  
*Grammatophora angulosa* Ehrenberg 1840  
*Grammatophora angulosa* var. *mediterranea* Grunow 1881  
*Grammatophora ocenica* Ehrenberg 1840  
*Striatella unipunctata* (Lyngbye) Agardh 1832  
*Achnanthes brevipes* var. *brevipes* Agardh 1824  
*Achnanthes brevipes* var. *intermedia* (Kützing) Cleve 1895  
*Achnanthes fimbriata* (Grunow) Ross 1963  
*Achnanthes fogedii* Håkansson 1978  
*Achnanthes elongata* Majewska & Van de Vijver 2017  
*Achnanthes groenlandica* var. *phinneyi* McIntire & Reimer 1974  
*Achnanthes parvula* Kützing 1844  
*Achnanthes* cf. *pseudogroenlandica* Hendey 1964  
*Achnanthes squaliformis* Majewska & Van de Vijver 2017  
*Amphicocconeis disculoides* (Hustedt) M. De Stefano & D. Marino 2002  
*Amphicocconeis* sp.  
*Anorthoneis* sp.

*Cocconeopsis cf. regularis* (Hustedt) Witkowski, Lange-Bertalot & Metzeltin 2000

***Cocconeopsis* spp.**

*Cocconeis britannica* Naegeli 1849

*Cocconeis cf. distans* Gregory 1855

*Cocconeis clandestina* A. Schmidt 1894

*Cocconeis krammeri* Lange-Bertalot & Metzeltin 1996

*Cocconeis latecostata* Hustedt 1955

*Cocconeis peltoides* Hustedt 1939

*Cocconeis pinnata* W. Gregory & Greville 1859

*Cocconeis placentula* Ehrenberg 1838

*Cocconeis scutellum* var. *scutellum* Ehrenberg 1838

***Cocconeis* spp.**

***Astartiella* sp.**

*Karayevia amoena* (Hustedt) Bukhtiyarova 2006

*Karayevia submarina* (Hustedt) Bukhtiyarova 2006

*Planothidium cf. campechianum* (Hustedt) A. Witkowski, H. Lange-Bertalot & D. Metzeltin 2000

*Planothidium delicatulum* (Kützing) Round & Bukhtiyarova 1996

*Planothidium depertidum* (Giffen) A. Witkowski, H. Lange-Bertalot & D. Metzeltin 2000

*Planothidium lanceolatum* (Brébisson & Kützing) Lange-Bertalot 1999

*Planothidium lilljeborgei* (Grunow) Witkowski, Lange-Bertalot & Metzeltin 2000

***Chelonicola* spp.**

*Rhoicosphenia abbreviata* (Agardh) Lange-Bertalot 1980

*Rhoicosphenia cf. adriatica* Caput Mihalic & Levkov 2010

***Tripterion* spp.**

*Dickieia cf. ulvaceae* Berkeley 1844

***Dickieia* spp.**

*Cymbella excisa* Kützing 1844

*Cymbella exica* var. *procera* Krammer 2002

*Cymbella excisisiformis* Krammer 2002

*Encyonema minutum* (Hilse) D.G. Mann 1990

*Navicymbula pusilla* var. *lata* K. Krammer 2003

*Lyrella abrupta* (Gregory) Mann 1990

*Lyrella amphoroides* D.G. Mann 1997

*Lyrella hennedyi* (W.Smith) Stickle & D.G.Mann 1990  
*Lyrella lyra* (Ehrenberg) Karajeva 1978  
*Navicula (Lyrella) lyra var. intermedia* Peragallo & Peragallo 1897  
*Lyrella majuscula* (Hustedt) Witkowski 1998  
*Navicula (Petroneis) humerosa var. arabica* H. Peragallo & M. Peragallo 1898  
*Petroneis marina* (Ralfs) Mann 1990  
*Mastogloia adriatica* Voigt 1963  
*Mastogloia angusta* Hustedt 1933  
*Mastogloia binotata* (Grunow) Cleve 1895  
*Mastogloia biocellata* (Grunow) Novarino & Muftah 1991  
*Mastogloia corsicana* (Grunow) H. Peragallo & M. Peragallo 1897  
*Mastogloia crucicula* (Grunow) Cleve 1895  
*Mastogloia crucicula var. alternans* Zanon 1948  
*Mastogloia cuneata* (Meister) Simonsen 1990  
*Mastogloia decipiens* Hustedt 1933  
*Mastogloia decussata* Grunow 1892  
*Mastogloia exilis* Hustedt 1933  
*Mastogloia lanceolata* Thwaites & W. Smith 1856  
*Mastogloia ovalis* Schmidt 1893  
*Mastogloia cf. pumila* Cleve 1895  
*Mastogloia pusilla var. pusilla* Grunow 1878  
*Mastogloia spp.*  
*Tetramphora cf. lineolata* (Ehrenberg) Mereschkowsky 1902  
*Berkeleya fennica* Juhlin-Dannfelt 1882  
*Climaconeis spp.*  
*Parlibellus berkeleyi* (Kützing) Cox 1988  
*Parlibellus cf. calvus* Witkowski, Metzeltin & Lange-Bertalot 2000  
*Luticola nivalis* (Ehrenberg) D.G. Mann 1990  
*Cistula lorenziana* (Grunow) Cleve 1894  
*Halamphora acutiuscula* (Kützing) Levkov 2009  
*Halamphora luciae* (Cholknoy) Levkov 2009  
*Halamphora subholsatica* (Krammer) Levkov 2009  
*Halamphora tenerrima* (Aleem & Hustedt) Levkov 2009

*Halamphora turgida* (Gregory) Levkov 2009  
*Halamphora subangularis* (Hustedt) Levkov 2009  
*Halamphora wisei* (M.M. Salah) I. Álvarez-Blanco & S. Blanco 2014  
*Halamphora* spp.  
*Brachysira aponina* Kützing 1836  
*Brachysira estonarium* A. Witkowski, H. Lange-Bertalot & D. Metzeltin 2000  
*Brachysira* sp.  
*Olifantiella seblae* Kaleli, Krzywda, Witkowski & Solak sp. nov.  
*Biremis lucens* (Hustedt) Sabbe, Witkowski & Vyverman 1995  
*Biremis* sp.  
*Fallacia cassubiae* Witkowski 1991  
*Fallacia florinae* (Møller) Witkowski 1993  
*Fallacia forcipata* (Greville) Stickle & Mann 1990  
*Fallacia* cf. *litoricola* (Hustedt) D.G. Mann 1990  
*Fallacia nyella* (Hustedt) D.G. Mann 1990  
*Fallacia oculiformis* (Hustedt) D.G. Mann 1990  
*Fallacia schaeferae* (Hustedt) D.G. Mann 1990  
*Fallacia* cf. *schoemania* (Foged) Witkowski, Lange-Bertalot & Metzeltin 2000  
*Fallacia* cf. *spatiata* (Østrup) Witkowski 2000  
*Fallacia subforcipata* (Hustedt) D.G. Mann 1990  
*Fallacia* spp.  
*Diploneis aestuari* Hustedt 1939  
*Diploneis bombus* (Ehrenberg) Ehrenberg 1853  
*Diploneis caffra* (Giffen) A. Witkowski, H. Lange-Bertalot & D. Metzeltin 2000  
*Diploneis coffaeiformis* (Schmidt) Cleve 1894  
*Diploneis crabro* (Ehrenberg) Ehrenberg 1854  
*Diploneis* cf. *mirabilis* König 1959  
*Diploneis papula* (A. Schmidt) Cleve 1894  
*Diploneis* cf. *parca* (A. Schmidt) Boyer 1927  
*Diploneis incurvata* var. *dubia* Hustedt 1933  
*Diploneis smithii* (Brébisson) Cleve 1894  
*Diploneis subcincta* (A. Schmidt) Cleve 1894  
*Diploneis suborbicularis* var. *constricta* Hustedt 1937

*Diploneis vacillans* (A. Schmidt) Cleve 1894

*Diploneis weissflogi* (Schmidt) Cleve 1894

*Diploneis* spp.

*Fogedia finmarchia* (Cleve & Grunow) Witkowski, Metzeltin & Lange-Bertalot 1997

*Fogedia giffeniana* (Foged) Witkowski, Lange-Bertalot, Metzeltin & Bafana 1997

*Fogedia* sp.

*Caloneis aemula* (Grunow & A. Schmidt) Cleve 1894

*Caloneis* cf. *excentrica* (Grunow) Boyer 1927

*Caloneis liber* (W. Smith) Cleve 1894

*Chamaepinnularia clamans* (Hustedt) A. Witkowski, H. Lange-Bertalot & D. Metzeltin 2000

*Hippodonta* spp.

*Navicula arenaria* var. *rostellata* Lange-Bertalot 1985

*Navicula athenae* Witkowski, Lange-Bertalot & Metzeltin 2000

*Navicula* cf. *borowkae* Witkowski, Lange-Bertalot & Metzeltin 2000

*Navicula duerrenbergiana* Hustedt 1934

*Navicula flantica* Grunow 1860

*Navicula normaloides* Cholnoky 1968

*Navicula* cf. *palpebralis* Brébisson & W. Smith 1853

*Navicula palpebralis* var. *angulosa* (Gregory) Van Heurck 1885

*Navicula palpebralis* cf. var. *minor* Grunow 1880

*Navicula palpebralis* cf. var. *undulata* Peragallo & Peragallo 1897

*Navicula pavillardii* Hustedt 1939

*Haslea spicula* (Hickie) Bukhtiyarova 1995

*Hippodonta subtilissima* Lange-Bertalot, Metzeltin & Witkowski 1996

*Navicula arenaria* var. *rostellata* Lange-Bertalot 1985

*Navicula athenae* Witkowski, Lange-Bertalot & Metzeltin 2000

*Navicula* cf. *borowkae* Witkowski, Lange-Bertalot & Metzeltin 2000

*Navicula duerrenbergiana* Hustedt 1934

*Navicula flantica* Grunow 1860

*Navicula normaloides* Cholnoky 1968

*Navicula* cf. *palpebralis* Brébisson & W. Smith 1853

*Navicula palpebralis* var. *angulosa* (Gregory) Van Heurck 1885

*Navicula palpebralis* cf. var. *minor* Grunow 1880

*Navicula palpebralis* cf. **var. undulata** Peragallo & Peragallo 1897  
*Navicula pavillardii* Hustedt 1939  
*Navicula perminuta* Grunow 1880  
*Navicula* cf. *ponticula* Giffen 1970  
*Navicula ramosissima* (C. Agardh) Cleve 1895  
*Navicula reichardtiana* Lange-Bertalot 1989  
*Navicula salinicola* Hustedt 1939  
*Navicula subagnita* Proschkina-Lavrenko 1963  
*Navicula tripunctata* (O.F. Müller) Bory 1822  
*Navicula* cf. *vekhovii* Lange-Bertalot & Genkal 1999  
*Navicula viminoides* Giffen 1975  
*Navicula* spp.  
*Seminavis robusta* D.B. Danielidis & D.G. Mann 2002  
*Seminavis strigosa* (Hustedt) Danielidis & Economou-Amilli 2003  
*Pinnunavis yarrensis* (Grunow) Okuno 1975  
*Pinnularia clavicolus* (Gregory) Rabenhorst 1864  
*Gyrosigma balticum* (Ehrenberg) Rabenhorst 1853  
*Gyrosigma eximium* (Thwaites) Boyer 1927  
*Gyrosigma wansbeckii* (Donkin) Cleve 1894  
*Pleurosigma elongatum* W. Smith 1852  
*Pleurosigma strigosum* W. Smith 1852  
*Toxonidea insignis* Donkin 1858  
*Plagiotropis* cf. *lepidoptera* (Gregory) Kuntze 1898  
*Amphora arcuata* A. Schmidt 1875  
*Amphora bigibba* var. *interrupta* (Grunow) Cleve 1895  
*Amphora cymbamphora* Cholnoky 1960  
*Amphora* cf. *egregia* Ehrenberg 1861  
*Amphora fluminensis* Grunow 1863  
*Amphora graeffeana* Hendey 1973  
*Amphora hyalina* Kützing 1844  
*Amphora marina* W. Smith 1857  
*Amphora montgomeryi* A.H. Wachnicka & E.E. Gaiser 2007  
*Amphora pediculus* (Kützing) Grunow 1875

*Amphora polita* Krasske 1939  
*Amphora proteus* var. *contigua* Cleve 1895  
*Amphora proteus* var. *oculata* H. Peragallo & M. Peragallo 1898  
*Amphora* spp.  
*Denticula subtilis* Grunow 1862  
*Denticula* sp.  
*Nitzschia aequorea* Hustedt 1939  
*Nitzschia amabilis* H. Suzuki 2010  
*Nitzschia* cf. *plioveterana* H. Lange-Bertalot 2000  
*Nitzschia* cf. *distans* Gregory 1857  
*Nitzschia elegantula* Grunow 1881  
*Nitzschia filiformis* (W. Smith) Van Heurck 1896  
*Nitzschia frustulum* (Kützing) Grunow 1880  
*Nitzschia grossestriata* Hustedt 1955  
*Nitzschia inconspicua* Grunow 1862  
*Nitzschia liebetruthii* Rabenhorst 1864  
*Nitzschia lorenziana* Grunow 1879  
*Nitzschia nana* Grunow 1881  
*Nitzschia normannii* Grunow 1881  
*Nitzschia pararostrata* (Lange-Bertalot) Lange-Bertalot 2000  
*Nitzschia parvula* W. Smith 1853  
*Nitzschia sigma* (Kützing) W. Smith 1853  
*Nitzschia valdestriata* Aleem & Hustedt 1951  
*Nitzschia volvendirostrata* Ashworth, Dąbek & Witkowski 2016  
*Nitzschia* spp.  
*Psammodisctyon mediterraneum* (Hustedt) Mann 1990  
*Psammodictyon panduriforme* var. *continua* Snoeijs 1998  
*Psammodictyon panduriforme* var. *delicatulum* (Grunow) Poulin 1990  
*Nitzschia* (*Psammodictyon*) *panduriforme* var. *minor* Grunow  
*Psammodictyon roridum* (Giffen) Mann 1990  
*Psammodictyon rudum* (Cholnoky) D.G Mann 1990  
*Tripterion* spp.  
*Tryblionella apiculata* Gregory 1857



*Tryblionella compressa* var. *compressa* (Bailey) Poulin 1990  
*Tryblionella compressa* var. *elongata* (Grunow) Lange-Bertalot 1987  
*Tryblionella granulata* (Grunow) D.G. Mann 1990  
*Tryblionella lanceola* Grunow 1878  
*Tryblionella levidensis* W. Smith 1856  
*Tryblionella navicularis* (Brébisson) Ralfs 1861  
*Epithemia argus* (Ehrenberg) Kützing 1844  
*Epithemia goeppertiana* Hilse 1860  
*Epithemia smithii* Carruthers 1864  
*Rhopalodia acuminata* Krammer 1987  
*Rhopalodia musculus* (Kützing) O. Müller 1900  
*Rhopalodia pacifica* Krammer 1987  
*Entomoneis* cf. *paludosa* (W. Smith) Reimer 1975  
*Petrodictyon gemma* (Ehrenberg) Mann 1990  
*Surirella atomus* Hustedt 1955  
*Surirella curvifacies* Brun 1895  
*Surirella fastuosa* (Ehrenberg) Ehrenberg 1843  
*Surirella striatula* Turpin 1828

**Table S2. SIMPER analysis of diatom taxa contributing (% cumulative = 90%) to similarities between epibiotic diatom assemblages from 2011.**

| Taxa                                                     |          |        |        |          |       |
|----------------------------------------------------------|----------|--------|--------|----------|-------|
|                                                          | Av.Abund | Av.Sim | Sim/SD | Contrib% | Cum.% |
| <i>Denticula subtilis</i> Grunow                         | 1.41     | 2.17   | 1.2    | 18.54    | 18.54 |
| <i>Fallacia subforcipata</i> (Hustedt) Mann              | 1.53     | 1.7    | 0.58   | 14.52    | 33.05 |
| <i>Fallacia oculiformis</i> (Hustedt) Mann               | 1.57     | 1.47   | 0.58   | 12.57    | 45.63 |
| <i>Halamphora tenerrima</i> (Aleem & Hustedt) Levkov     | 2.28     | 1.35   | 0.58   | 11.57    | 57.2  |
| <i>Navicula</i> cf. <i>palpebralis</i> Brébisson & Smith | 1.37     | 1      | 0.58   | 8.59     | 65.79 |
| <i>Meloneis mimallis</i> Louvrou et al.                  | 0.89     | 1      | 0.58   | 8.57     | 74.36 |
| <i>Achnanthes fogedii</i> Håkansson                      | 0.91     | 0.96   | 0.58   | 8.18     | 82.55 |
| <i>Biremis lucens</i> (Hustedt) Sabbe et al.             | 1.06     | 0.93   | 0.58   | 7.95     | 90.5  |

**Table S3. SIMPER analysis of diatom taxa contributing (% cumulative = 91%) to similarities between epibiotic diatom assemblages from 2012.**

| Taxa                                                   | Av.Abund | Av.Sim | Sim/SD | Contrib% | Cum.% |
|--------------------------------------------------------|----------|--------|--------|----------|-------|
| <i>Nitzschia frustulum</i> (Kützing) Grunow            | 4.29     | 5.41   | 1.06   | 20.13    | 20.13 |
| <i>Navicula perminuta</i> Grunow                       | 2.17     | 2.66   | 1.12   | 9.90     | 30.03 |
| <i>Nitzschia liebethuthii</i> Rabenhorst               | 1.71     | 2.44   | 1.09   | 9.09     | 39.12 |
| <i>Tripterion</i> sp.2                                 | 1.99     | 2.13   | 0.83   | 7.93     | 47.05 |
| <i>Halamphora tenerrima</i> (Aleem & Hustedt) Levkov   | 1.66     | 1.60   | 0.62   | 5.97     | 53.02 |
| <i>Delphineis australis</i> (Petit) Watanabe et al.    | 1.37     | 1.49   | 0.94   | 5.54     | 58.56 |
| <i>Navicula normaloides</i> Cholnoky                   | 0.93     | 1.02   | 1.12   | 3.80     | 62.36 |
| <i>Halamphora luciae</i> (Cholnoky) Levkov             | 1.47     | 0.94   | 0.54   | 3.50     | 65.86 |
| <i>Cocconeis placentula</i> Ehrenberg                  | 0.62     | 0.81   | 1.15   | 3.03     | 68.89 |
| <i>Karayevia submarina</i> (Hustedt) Bukhtiyarova      | 0.55     | 0.81   | 1.15   | 3.03     | 71.92 |
| <i>Tabularia fasciculata</i> (Agardh) Williams & Round | 0.59     | 0.62   | 0.62   | 2.30     | 74.22 |
| <i>Nitzschia</i> sp.20                                 | 0.62     | 0.55   | 0.58   | 2.06     | 76.28 |
| <i>Nitzschia</i> sp.19                                 | 0.52     | 0.53   | 0.61   | 1.97     | 78.25 |
| <i>Amphora marina</i> Smith                            | 0.91     | 0.50   | 0.59   | 1.85     | 80.10 |
| <i>Tryblionella granulata</i> (Grunow) Mann            | 0.95     | 0.49   | 0.60   | 1.84     | 81.93 |
| <i>Diploneis bombus</i> (Ehrenberg) Ehrenberg          | 0.54     | 0.44   | 0.61   | 1.65     | 83.59 |
| <i>Cocconeis</i> sp.19                                 | 0.44     | 0.44   | 0.62   | 1.65     | 85.24 |
| <i>Brachysira estonarium</i> Witkowski et al.          | 0.71     | 0.44   | 0.62   | 1.64     | 86.88 |
| <i>Tryblionella lanceola</i> Grunow                    | 0.42     | 0.40   | 0.62   | 1.50     | 88.38 |
| <i>Melosira moniliformis</i> (Müller) Agardh           | 0.58     | 0.39   | 0.62   | 1.45     | 89.82 |
| <i>Tryblionella apiculata</i> Gregory                  | 0.71     | 0.32   | 0.32   | 1.20     | 91.02 |

**Table S4. SIMPER analysis of diatom taxa contributing (% cumulative = 90%) to similarities between epibiotic diatom assemblages from 2013.**

| Taxa                                                    | Av.Abund | Av.Sim | Sim/SD | Contrib% | Cum.% |
|---------------------------------------------------------|----------|--------|--------|----------|-------|
| <i>Delphineis australis</i> (Petit) Watanabe et al.     | 2.25     | 2.57   | 0.75   | 17.88    | 17.88 |
| <i>Grammatophora angulosa</i> Ehrenberg                 | 1.61     | 1.53   | 0.55   | 10.64    | 28.52 |
| <i>Navicula perminuta</i> Grunow                        | 1.51     | 1.32   | 0.54   | 9.18     | 37.69 |
| <i>Meloneis mimallis</i> Louvrou et al.                 | 1.14     | 1.06   | 0.57   | 7.39     | 45.09 |
| <i>Nitzschia frustulum</i> (Kützing) Grunow             | 1.31     | 0.84   | 0.46   | 5.82     | 50.91 |
| <i>Delphineis</i> sp.1                                  | 0.97     | 0.7    | 0.49   | 4.85     | 55.76 |
| <i>Diplomenora cocconeiformis</i> (Schmidt) Blazé       | 0.84     | 0.56   | 0.4    | 3.9      | 59.66 |
| <i>Achnanthes elongata</i> Majewska & Van de Vijver     | 1.27     | 0.53   | 0.17   | 3.68     | 63.33 |
| <i>Tryblionella granulata</i> (Grunow) Mann             | 0.87     | 0.38   | 0.42   | 2.63     | 65.96 |
| <i>Nitzschia liebetruithii</i> Rabenhorst               | 0.76     | 0.35   | 0.33   | 2.41     | 68.37 |
| <i>Cocconeis scutellum</i> Ehrenberg                    | 0.66     | 0.28   | 0.29   | 1.95     | 70.32 |
| <i>Olifantiella</i> sp.1                                | 0.52     | 0.27   | 0.39   | 1.89     | 72.21 |
| <i>Achnanthes squaliformis</i> Majewska & Van de Vijver | 0.55     | 0.23   | 0.2    | 1.59     | 73.8  |
| <i>Navicula</i> sp.54                                   | 0.66     | 0.22   | 0.34   | 1.55     | 75.35 |
| <i>Nitzschia</i> sp.20                                  | 0.56     | 0.21   | 0.24   | 1.44     | 76.8  |
| <i>Psammodictyon rudum</i> (Cholnoky) Mann              | 0.7      | 0.2    | 0.22   | 1.41     | 78.21 |
| <i>Cocconeis placentula</i> Ehrenberg                   | 0.43     | 0.18   | 0.32   | 1.27     | 79.48 |
| <i>Navicula normaloides</i> Cholnoky                    | 0.63     | 0.18   | 0.26   | 1.24     | 80.72 |
| <i>Tripterion</i> sp.2                                  | 0.76     | 0.17   | 0.15   | 1.22     | 81.93 |
| <i>Halamphora tenerima</i> (Aleem & Hustedt) Levkov     | 0.38     | 0.13   | 0.21   | 0.92     | 82.86 |
| <i>Melosira moniliformis</i> (Müller) Agardh            | 0.44     | 0.12   | 0.28   | 0.86     | 83.72 |
| <i>Diploneis bombus</i> (Ehrenberg) Ehrenberg           | 0.33     | 0.11   | 0.25   | 0.79     | 84.52 |
| <i>Tryblionella lanceola</i> Grunow                     | 0.33     | 0.11   | 0.29   | 0.75     | 85.27 |
| <i>Paralia sulcata</i> (Ehrenberg) Cleve                | 0.28     | 0.11   | 0.28   | 0.75     | 86.02 |
| <i>Amphora polita</i> Krasske                           | 0.3      | 0.11   | 0.25   | 0.74     | 86.76 |
| <i>Navicula</i> sp.55                                   | 0.42     | 0.1    | 0.23   | 0.7      | 87.46 |
| <i>Achnanthes pseudogroenlandica</i> Hendey             | 0.31     | 0.09   | 0.18   | 0.63     | 88.1  |
| <i>Cymatosira lorenziana</i> Grunow                     | 0.32     | 0.09   | 0.22   | 0.61     | 88.7  |
| <i>Amphora marina</i> Smith                             | 0.26     | 0.06   | 0.22   | 0.45     | 89.15 |
| <i>Mastogloia pusilla</i> var. <i>pusilla</i> Grunow    | 0.24     | 0.06   | 0.23   | 0.42     | 89.57 |
| <i>Diploneis coffaeiformis</i> (Schmidt) Cleve          | 0.25     | 0.06   | 0.17   | 0.41     | 89.98 |
| <i>Cocconeis</i> sp.8                                   | 0.3      | 0.06   | 0.13   | 0.41     | 90.39 |

**Table S5. SIMPER analysis of diatom taxa contributing (% cumulative = 90%) to similarities between epibiotic diatom assemblages from 2014.**

| Taxa                                                                       | Av.Abund | Av.Sim | Sim/SD | Contrib% | Cum.% |
|----------------------------------------------------------------------------|----------|--------|--------|----------|-------|
| <i>Navicula perminuta</i> Grunow                                           | 3.03     | 3.69   | 6.51   | 9.73     | 9.73  |
| <i>Nitzschia frustulum</i> (Kützing) Grunow                                | 3.13     | 2.77   | 2.31   | 7.31     | 17.04 |
| <i>Cocconeis placentula</i> Ehrenberg                                      | 2.17     | 2.43   | 2.03   | 6.41     | 23.45 |
| <i>Navicula</i> sp.54                                                      | 2.03     | 2.27   | 1.67   | 5.97     | 29.42 |
| <i>Navicula</i> sp.55                                                      | 1.92     | 2.01   | 2.41   | 5.29     | 34.71 |
| <i>Nitzschia liebetruithii</i> Rabenhorst                                  | 1.48     | 1.68   | 2.5    | 4.41     | 39.12 |
| <i>Melosira moniliformis</i> (Müller) Agardh                               | 1.87     | 1.64   | 1.33   | 4.33     | 43.45 |
| <i>Tryblionella granulata</i> (Grunow) Mann                                | 1.31     | 1.51   | 2.46   | 3.98     | 47.43 |
| <i>Seminavis strigosa</i> (Hustedt) Danielidis & Economou-Amilli           | 1.32     | 1.21   | 1.49   | 3.2      | 50.63 |
| <i>Navicula</i> sp.52                                                      | 1.35     | 1.05   | 1.67   | 2.77     | 53.4  |
| <i>Tryblionella apiculata</i> Gregory                                      | 0.91     | 0.91   | 1.76   | 2.4      | 55.8  |
| <i>Delphineis australis</i> (Petit) Watanabe et al.                        | 1.65     | 0.85   | 0.72   | 2.24     | 58.04 |
| <i>Olifantiella</i> sp.1                                                   | 1.15     | 0.83   | 1.02   | 2.18     | 60.23 |
| <i>Tabularia fasciculata</i> (Agardh) Williams & Round                     | 1.54     | 0.78   | 0.98   | 2.04     | 62.27 |
| <i>Diploneis</i> cf. <i>mirabilis</i> König                                | 0.89     | 0.72   | 0.93   | 1.91     | 64.18 |
| <i>Karayevia submarina</i> (Hustedt) Bukhtiyarova                          | 0.81     | 0.72   | 1.04   | 1.9      | 66.07 |
| <i>Grammatophora angulosa</i> Ehrenberg                                    | 0.85     | 0.71   | 1.06   | 1.87     | 67.94 |
| <i>Achnanthes elongata</i> Majewska & Van de Vijver                        | 0.88     | 0.65   | 0.96   | 1.7      | 69.64 |
| <i>Nitzschia</i> sp.20                                                     | 0.97     | 0.58   | 1.06   | 1.53     | 71.17 |
| <i>Cocconeis scutellum</i> Ehrenberg                                       | 0.75     | 0.55   | 0.87   | 1.46     | 72.63 |
| <i>Paralia sulcata</i> (Ehrenberg) Cleve                                   | 0.69     | 0.54   | 1.15   | 1.43     | 74.06 |
| <i>Delphineis</i> sp.1                                                     | 0.87     | 0.54   | 1.05   | 1.43     | 75.49 |
| <i>Psammodyctyon panduriforme</i> var. <i>continua</i> Snoeijs             | 0.74     | 0.51   | 0.86   | 1.34     | 76.82 |
| <i>Navicula normaloides</i> Cholnoky                                       | 0.7      | 0.48   | 0.83   | 1.26     | 78.09 |
| <i>Diploneis bombus</i> Ehrenberg (Ehrenberg)                              | 0.51     | 0.47   | 1.1    | 1.24     | 79.32 |
| <i>Tripterion</i> sp.2                                                     | 0.76     | 0.47   | 0.78   | 1.23     | 80.56 |
| <i>Navicula pavillardii</i> Hustedt                                        | 0.68     | 0.46   | 1.02   | 1.22     | 81.77 |
| <i>Amphora marina</i> Smith                                                | 0.67     | 0.43   | 0.99   | 1.13     | 82.9  |
| <i>Psammodyctyon rudum</i> (Cholnoky) Mann                                 | 0.56     | 0.36   | 0.61   | 0.95     | 83.84 |
| <i>Navicula salinicola</i> Hustedt                                         | 0.41     | 0.35   | 1.07   | 0.93     | 84.77 |
| <i>Rhopalodia pacifica</i> Krammer                                         | 0.48     | 0.29   | 0.62   | 0.76     | 85.53 |
| <i>Tryblionella lanceola</i> Grunow                                        | 0.67     | 0.27   | 0.48   | 0.71     | 86.25 |
| <i>Meloneis mimallis</i> Louvrou et al.                                    | 0.79     | 0.27   | 0.46   | 0.71     | 86.96 |
| <i>Tryblionella compressa</i> var. <i>elongata</i> (Grunow) Lange-Bertalot | 0.75     | 0.27   | 0.46   | 0.71     | 87.67 |
| <i>Amphora</i> sp.10                                                       | 0.43     | 0.26   | 0.61   | 0.68     | 88.35 |
| <i>Cymbella excisa</i> Kützing                                             | 0.42     | 0.24   | 0.61   | 0.64     | 88.98 |
| <i>Halamphora acutiuscula</i> (Kützing) Levkov                             | 0.36     | 0.23   | 0.6    | 0.61     | 89.6  |
| <i>Diploneis coffaeiformis</i> (Schmidt) Cleve                             | 0.42     | 0.2    | 0.62   | 0.53     | 90.13 |

**Table S6. The ecological distribution of dominant taxa** (1- Guiry & Guiry, 2019; 2- Kociolek et al. 2019, 3- Witkowski et al., 2000; M- Marine, B- Brackish & F- Freshwater).

| Taxa                                                                  | 1   | 2   | 3   | Taxa                                                     | 1   | 2     | 3   |
|-----------------------------------------------------------------------|-----|-----|-----|----------------------------------------------------------|-----|-------|-----|
| <i>Achnanthes elongata</i> Majewska & Van de Vijver                   | M   | -   | -   | <i>Navicula perminuta</i> Grunow                         | M,B | M,F   | B   |
| <i>Delphineis australis</i> (Petit) Watanabe et al.                   | M   | M   | M   | <i>Navicula viminoides</i> Giffen                        | M,F | M,B,F | M,B |
| <i>Encyonema minutum</i> (Hilse) D.G.Mann                             | F   | M,F | -   | <i>Neosynedra provincialis</i> (Grunow) Williams & Round | M   | F     | M   |
| <i>Fallacia cassubiae</i> Witkowski                                   | -   | -   | B   | <i>Nitzschia frustulum</i> (Kützing) Grunow              | M,F | M,F   | M,B |
| <i>Fallacia florinae</i> (Møller) Witkowski                           | M   | M   | M,B | <i>Nitzschia volvendirostrata</i> Ashworth et al.        | M   | M     | -   |
| <i>Grammatophora angulosa</i> Ehrenberg                               | M   | M,F | M   | <i>Olifantiella seblae</i> Kaleli et al.                 | -   | -     | -   |
| <i>Halamphora tenerrima</i> (Aleem & Husted) Levkov                   | M,B | M   | M   | <i>Psammodictyon rudum</i> (Cholnoky) Mann               | M   | M     | M   |
| <i>Mastogloia crucicula</i> var. <i>alternans</i> Zanon               | -   | -   | M   | <i>Rhoicosphenia abbreviata</i> (Agardh) LangeBertalot   | F   | M     | F,B |
| <i>Navicula palpebralis</i> var. <i>angulosa</i> (Gregory) Van Heurck | F   | M,B | M   |                                                          |     |       |     |
